# Supplementary material
Source: PubMed Central journal article supplement (PMC6121739)

**Rapid Decline in Lung Function and Risk of Cardiovascular Disease: the Atherosclerosis  
Risk in Communities Study**

**Short title:** Lung function decline and incident cardiovascular disease

**SUPPLEMENTARY MATERIAL**

**Supplemental table 1- Adjusted odds ratio of cardiovascular disease for the comparison between quartiles of decline in FEV1 or FVC**

| <b>Outcomes</b>                                  | <b>FEV<sub>1</sub> criteria</b> |        | <b>FVC criteria</b> |        |
|--------------------------------------------------|---------------------------------|--------|---------------------|--------|
|                                                  | HR (95%CI)                      | p      | HR (95%CI)          | p      |
| <b><i>Heart failure</i></b>                      |                                 |        |                     |        |
| Quartile 1 (best)                                | Ref                             |        | Ref                 |        |
| Quartile 2                                       | 1.11(0.94-1.30)                 | 0.23   | 0.97(0.82-1.15)     | 0.73   |
| Quartile 3                                       | 1.13(0.96-1.33)                 | 0.14   | 1.11(0.94-1.30)     | 0.21   |
| Quartile 4 (worst)                               | 1.27(1.08-1.48)                 | 0.003  | 1.30(1.12-1.52)     | 0.001  |
| <b><i>Coronary disease</i></b>                   |                                 |        |                     |        |
| Quartile 1 (best)                                | Ref                             |        | Ref                 |        |
| Quartile 2                                       | 1.04(0.86-1.26)                 | 0.68   | 1.06(0.88-1.28)     | 0.55   |
| Quartile 3                                       | 1.16(0.96-1.40)                 | 0.12   | 1.05(0.87-1.26)     | 0.64   |
| Quartile 4 (worst)                               | 1.12(0.93-1.35)                 | 0.22   | 1.17(0.97-1.40)     | 0.10   |
| <b><i>Stroke</i></b>                             |                                 |        |                     |        |
| Quartile 1 (best)                                | Ref                             |        | Ref                 |        |
| Quartile 2                                       | 0.78(0.61-1.00)                 | 0.048  | 0.86(0.67-1.09)     | 0.21   |
| Quartile 3                                       | 0.85(0.67-1.07)                 | 0.17   | 1.02(0.81-1.29)     | 0.87   |
| Quartile 4 (worst)                               | 1.10(0.88-1.37)                 | 0.40   | 1.06(0.84-1.34)     | 0.61   |
| <b><i>Death</i></b>                              |                                 |        |                     |        |
| Quartile 1 (best)                                | Ref                             |        | Ref                 |        |
| Quartile 2                                       | 1.03(0.91-1.16)                 | 0.66   | 0.93(0.83-1.05)     | 0.26   |
| Quartile 3                                       | 1.02(0.90-1.14)                 | 0.80   | 1.03(0.92-1.16)     | 0.58   |
| Quartile 4 (worst)                               | 1.19(1.07-1.34)                 | 0.002  | 1.26(1.13-1.41)     | <0.001 |
| <b><i>Composite endpoint without death</i></b>   |                                 |        |                     |        |
| Quartile 1 (best)                                | Ref                             |        | Ref                 |        |
| Quartile 2                                       | 0.98(0.87-1.12)                 | 0.82   | 0.99(0.87-1.12)     | 0.89   |
| Quartile 3                                       | 1.10(0.97-1.24)                 | 0.13   | 1.09(0.97-1.24)     | 0.16   |
| Quartile 4 (worst)                               | 1.18(1.05-1.33)                 | <0.007 | 1.23(1.09-1.39)     | 0.001  |
| <b><i>Composite endpoint including death</i></b> |                                 |        |                     |        |

|                    | Ref             |        | Ref             |        |
|--------------------|-----------------|--------|-----------------|--------|
| Quartile 1 (best)  |                 |        |                 |        |
| Quartile 2         | 1.03(0.93-1.13) | 0.59   | 0.99(0.90-1.10) | 0.92   |
| Quartile 3         | 1.09(0.99-1.21) | 0.072  | 1.07(0.98-1.18) | 0.15   |
| Quartile 4 (worst) | 1.19(1.08-1.31) | <0.001 | 1.24(1.13-1.36) | <0.001 |

FEV<sub>1</sub>: forced expiratory volume in 1 s; FVC: forced vital capacity; HR (95%CI): hazard ratio and 95% confidence interval

FEV<sub>1</sub> criteria ( $\Delta$  % predicted FEV<sub>1</sub>/yr): quartile 1 < (-0.32); quartile 2= (-0.32) to 0.77; quartile 3= 0.77 to 1.92; quartile 4 >1.92;

FVC criteria ( $\Delta$  % predicted FVC/yr): quartile 1 < (-0.15); quartile 2= (-0.15) to 0.92; quartile 3= 0.92 to 2.12; quartile 4 >2.12;

Adjusted for baseline FEV<sub>1</sub>, age, sex, race, and height, ARIC center, body mass index, heart rate, low-density-lipoprotein cholesterol, lipid-lowering medication, NT-proBNP, diabetes, hypertension, and smoking. Composite endpoint includes heart failure, stroke, and coronary disease.

**Supplemental Table 2- Comparison between non-included and included individuals for the analysis**

| Characteristics                   | Non-included (n=2224) | Included (n=10351) | p-value |
|-----------------------------------|-----------------------|--------------------|---------|
| Age –years                        | 54.6 ± 5.9            | 53.1 ± 5.7         | <0.001  |
| Male gender (%)                   | 907 (41)              | 4543 (44)          | 0.007   |
| Race – White (%)                  | 1131 (51)             | 8331 (81)          | <0.001  |
| Center                            |                       |                    | <0.001  |
| Forsyth (%)                       | 521 (23)              | 2717 (26)          |         |
| Jackson (%)                       | 971 (44)              | 1755 (17)          |         |
| Minneapolis (%)                   | 312 (14)              | 3167 (31)          |         |
| Washington (%)                    | 420 (19)              | 2712 (26)          |         |
| Height - cm                       | 167.9 ± 9.3           | 168.5 ± 9.3        | 0.006   |
| BMI(kg/m <sup>2</sup> )           | 28.4 ± 5.9            | 27.3 ± 4.9         | <0.001  |
| Heart rate - bpm                  | 67.5 ± 11.1           | 66.2 ± 9.8         | <0.001  |
| Systolic BP (mmHg)                | 123.9 ± 20.7          | 119.4 ± 17.3       | <0.001  |
| Diastolic BP (mmHg)               | 75.4 ± 12.1           | 73.0 ± 10.6        | <0.001  |
| Hypertension (%)                  | 884 (40)              | 2920 (28)          | <0.001  |
| Diabetes (%)                      | 341 (16)              | 845 (8)            | <0.001  |
| LDL cholesterol                   | 136.2 ± 40.1          | 136.9 ± 38.5       | 0.43    |
| Current smoking (%)               | 597 (27)              | 2418 (23)          | <0.001  |
| Lipid lowering medications (%)    | 49 (2)                | 255 (3)            | 0.48    |
| Anti-hypertensive medications (%) | 684 (31)              | 2411 (23)          | <0.001  |
| NT-proBNP (pg/mL)                 | 50 [27 - 94]          | 49 [26 - 88]       | 0.029   |
| hs-CRP (mg/L)                     | 2.7 [1.2 - 5.8]       | 2.1 [1.0 - 4.3]    | <0.001  |

\*Non-included were individuals with poor-quality or missing spirometry at Visit 2 who were not included in the study sample.

**Supplemental Table 3. Risk of cardiovascular disease according to decline in FEV<sub>1</sub>/FVC ratio**

| Outcomes                                         | n    | Events | Incidence rate/1000p-y | Model 1         |        | Model 2         |        | Model 3         |       |
|--------------------------------------------------|------|--------|------------------------|-----------------|--------|-----------------|--------|-----------------|-------|
|                                                  |      |        |                        | HR (95%CI)      | p      | HR (95%CI)      | p      | HR (95%CI)      | p     |
| <b><i>Heart failure</i></b>                      |      |        |                        |                 |        |                 |        |                 |       |
| Non-rapid decliners                              | 7764 | 1061   | 7.4 (7.0-7.8)          | Ref             |        | Ref             |        | Ref             |       |
| Rapid decliners                                  | 2587 | 412    | 8.9 (8.1-9.8)          | 1.21(1.08-1.35) | 0.001  | 1.27(1.14-1.43) | <0.001 | 1.23(1.09-1.40) | 0.001 |
| <b><i>Coronary disease</i></b>                   |      |        |                        |                 |        |                 |        |                 |       |
| Non-rapid decliners                              | 7764 | 786    | 5.5 (5.1-5.9)          | Ref             |        | Ref             |        | Ref             |       |
| Rapid decliners                                  | 2587 | 307    | 6.6 (5.9-7.4)          | 1.20(1.05-1.37) | 0.006  | 1.18(1.04-1.35) | 0.015  | 1.14(0.99-1.32) | 0.073 |
| <b><i>Stroke</i></b>                             |      |        |                        |                 |        |                 |        |                 |       |
| Non-rapid decliners                              | 7764 | 489    | 3.4 (3.1-3.7)          | Ref             |        | Ref             |        | Ref             |       |
| Rapid decliners                                  | 2587 | 175    | 3.8 (3.3-4.4)          | 1.11(0.93-1.32) | 0.24   | 1.13(0.95-1.34) | 0.17   | 1.05(0.87-1.27) | 0.59  |
| <b><i>Death</i></b>                              |      |        |                        |                 |        |                 |        |                 |       |
| Non-rapid decliners                              | 7764 | 2027   | 13.5 (12.9-14.1)       | Ref             |        | Ref             |        | Ref             |       |
| Rapid decliners                                  | 2587 | 825    | 16.7 (15.6-17.9)       | 1.25(1.15-1.35) | <0.001 | 1.28(1.18-1.39) | <0.001 | 1.12(1.02-1.22) | 0.013 |
| <b><i>Composite endpoint without death</i></b>   |      |        |                        |                 |        |                 |        |                 |       |
| Non-rapid decliners                              | 7764 | 1789   | 13.0 (12.4-13.6)       | Ref             |        | Ref             |        | Ref             |       |
| Rapid decliners                                  | 2587 | 676    | 15.3 (14.2-16.5)       | 1.19(1.09-1.30) | <0.001 | 1.21(1.10-1.32) | <0.001 | 1.15(1.05-1.27) | 0.004 |
| <b><i>Composite endpoint including death</i></b> |      |        |                        |                 |        |                 |        |                 |       |
| Non-rapid decliners                              | 7764 | 2899   | 21.1 (20.3-21.9)       | Ref             |        | Ref             |        | Ref             |       |
| Rapid decliners                                  | 2587 | 1110   | 25.2 (23.8 -26.7)      | 1.20(1.12-1.29) | <0.001 | 1.22(1.14-1.31) | <0.001 | 1.11(1.03-1.20) | 0.005 |

Model 1: unadjusted; Model 2: adjusted for baseline FEV<sub>1</sub>, age, sex, race, and height; Model 3: additionally adjusted for ARIC center, body mass index, heart rate, low-density-lipoprotein cholesterol, lipid-lowering medication, NT-proBNP, diabetes, hypertension, and smoking. Composite endpoint includes heart failure, stroke, and coronary disease.

FEV<sub>1</sub>: forced expiratory volume in 1 s; FVC: forced vital capacity; HR (95%CI): hazard ratio and 95% confidence interval

**Supplemental Table 4. Risk of heart failure according to decline in percentage of predicted FEV<sub>1</sub> by baseline FEV<sub>1</sub> (normal versus abnormal)**

| Outcome              | Baseline FEV <sub>1</sub> <80% |        |                 |       | Baseline FEV <sub>1</sub> ≥80% |        |                 |      |
|----------------------|--------------------------------|--------|-----------------|-------|--------------------------------|--------|-----------------|------|
|                      | n                              | Events | HR (95% CI)     | p     | n                              | Events | HR (95% CI)     | p    |
| <i>Heart failure</i> |                                |        |                 |       |                                |        |                 |      |
| Non-rapid decliners  | 1043                           | 255    | Ref             |       | 6724                           | 788    | Ref             |      |
| Rapid decliners      | 380                            | 119    | 1.53(1.20-1.95) | 0.001 | 2204                           | 311    | 1.06(0.92-1.23) | 0.38 |

p for interaction=0.004; FEV<sub>1</sub>: forced expiratory volume in 1 s; HR (95% CI): hazard ratio and 95% confidence interval. HRs are from a fully adjusted Model 3: baseline FEV<sub>1</sub>, age, sex, race, height, ARIC center, body mass index, heart rate, low-density-lipoprotein cholesterol, lipid-lowering medication, NT-proBNP, diabetes, hypertension, and smoking.

**Supplemental Table 5. Risk of cardiovascular disease according to change in the percentage of predicted FEV<sub>1</sub> and FVC modeled as a continuous variable**

| <b>Outcomes</b>                                  | <b>Model 1</b>   |        | <b>Model 2</b>   |        | <b>Model 3</b>   |        |
|--------------------------------------------------|------------------|--------|------------------|--------|------------------|--------|
|                                                  | HR (95%CI)       | p      | HR (95%CI)       | p      | HR (95%CI)       | p      |
| <b><i>Heart failure</i></b>                      |                  |        |                  |        |                  |        |
| Delta in FEV <sub>1</sub> (%/year)               | 1.05 (1.03-1.08) | <0.001 | 1.06 (1.04-1.08) | <0.001 | 1.04 (1.02-1.06) | 0.001  |
| Delta in FVC (%/year)                            | 1.06 (1.04-1.08) | <0.001 | 1.08 (1.06-1.09) | <0.001 | 1.04 (1.02-1.07) | <0.001 |
| <b><i>Coronary disease</i></b>                   |                  |        |                  |        |                  |        |
| Delta in FEV <sub>1</sub> (%/year)               | 1.04 (1.02-1.07) | 0.002  | 1.04 (1.01-1.07) | 0.002  | 1.03 (1.00-1.05) | 0.076  |
| Delta in FVC (%/year)                            | 1.04 (1.02-1.07) | <0.001 | 1.05 (1.02-1.07) | <0.001 | 1.03 (1.00-1.05) | 0.041  |
| <b><i>Stroke</i></b>                             |                  |        |                  |        |                  |        |
| Delta in FEV <sub>1</sub> (%/year)               | 1.02 (0.98-1.05) | 0.37   | 1.03 (0.99-1.06) | 0.13   | 0.99 (0.96-1.03) | 0.89   |
| Delta in FVC (%/year)                            | 1.04 (1.01-1.08) | 0.01   | 1.05 (1.02-1.08) | 0.003  | 1.02 (0.99-1.05) | 0.20   |
| <b><i>Death</i></b>                              |                  |        |                  |        |                  |        |
| Delta in FEV <sub>1</sub> (%/year)               | 1.05 (1.04-1.07) | <0.001 | 1.05 (1.04-1.07) | <0.001 | 1.03 (1.02-1.05) | <0.001 |
| Delta in FVC (%/year)                            | 1.06 (1.04-1.07) | <0.001 | 1.05 (1.04-1.07) | <0.001 | 1.04 (1.02-1.05) | <0.001 |
| <b><i>Composite endpoint without death</i></b>   |                  |        |                  |        |                  |        |
| Delta in FEV <sub>1</sub> (%/year)               | 1.04 (1.02-1.06) | <0.001 | 1.04 (1.03-1.06) | <0.001 | 1.02 (1.00-1.04) | 0.013  |
| Delta in FVC (%/year)                            | 1.05 (1.03-1.07) | <0.001 | 1.06 (1.04-1.07) | <0.001 | 1.03 (1.01-1.05) | <0.001 |
| <b><i>Composite endpoint including death</i></b> |                  |        |                  |        |                  |        |
| Delta in FEV <sub>1</sub> (%/year)               | 1.04 (1.02-1.06) | <0.001 | 1.04 (1.03-1.06) | <0.001 | 1.03 (1.01-1.04) | <0.001 |
| Delta in FVC (%/year)                            | 1.05 (1.03-1.06) | <0.001 | 1.06 (1.04-1.07) | <0.001 | 1.03 (1.02-1.04) | <0.001 |

Model 1: unadjusted; Model 2: adjusted for baseline FEV<sub>1</sub>, age, sex, race, and height; Model 3: additionally adjusted for ARIC center, body mass index, heart rate, low-density-lipoprotein cholesterol, lipid-lowering medication, NT-proBNP, diabetes, hypertension, and smoking. Composite endpoint includes heart failure, stroke, and coronary disease.

FEV<sub>1</sub>: forced expiratory volume in 1 s; FVC: forced vital capacity; HR (95%CI): hazard ratio and 95% confidence interval

**Supplemental Table 6. Risk of cardiovascular disease according to decline in percentage of predicted FEV<sub>1</sub> stratified for smokers (current and former) versus never smokers**

| Outcomes                                         | Smokers (current and former) |        |                 |       | Never smokers   |        |                 |       | p for interaction* |
|--------------------------------------------------|------------------------------|--------|-----------------|-------|-----------------|--------|-----------------|-------|--------------------|
|                                                  | Model 1                      |        | Model 3         |       | Model 1         |        | Model 3         |       |                    |
|                                                  | HR (95%CI)                   | p      | HR (95%CI)      | p     | HR (95%CI)      | p      | HR (95%CI)      | p     |                    |
| <b><i>Heart failure</i></b>                      |                              |        |                 |       |                 |        |                 |       |                    |
| Non-rapid decliners                              | Ref                          |        | Ref             |       | Ref             |        | Ref             |       |                    |
| Rapid decliners                                  | 1.31(1.14-1.49)              | <0.001 | 1.18(1.02-1.37) | 0.027 | 1.31(1.06-1.61) | 0.011  | 1.17(0.93-1.46) | 0.18  | 0.85               |
| <b><i>Coronary disease</i></b>                   |                              |        |                 |       |                 |        |                 |       |                    |
| Non-rapid decliners                              | Ref                          |        | Ref             |       | Ref             |        | Ref             |       |                    |
| Rapid decliners                                  | 1.10(0.93-1.29)              | 0.26   | 0.96(0.80-1.14) | 0.64  | 1.46(1.16-1.85) | 0.001  | 1.28(0.99-1.66) | 0.062 | 0.047              |
| <b><i>Stroke</i></b>                             |                              |        |                 |       |                 |        |                 |       |                    |
| Non-rapid decliners                              | Ref                          |        | Ref             |       | Ref             |        | Ref             |       |                    |
| Rapid decliners                                  | 1.26(1.03-1.56)              | 0.028  | 1.19(0.95-1.49) | 0.13  | 1.49(1.13-1.97) | 0.005  | 1.33(0.99-1.81) | 0.062 | 0.72               |
| <b><i>Death</i></b>                              |                              |        |                 |       |                 |        |                 |       |                    |
| Non-rapid decliners                              | Ref                          |        | Ref             |       | Ref             |        | Ref             |       |                    |
| Rapid decliners                                  | 1.37(1.25-1.50)              | <0.001 | 1.17(1.06-1.30) | 0.003 | 1.32(1.14-1.54) | <0.001 | 1.16(0.98-1.36) | 0.083 | 0.85               |
| <b><i>Composite endpoint without death</i></b>   |                              |        |                 |       |                 |        |                 |       |                    |
| Non-rapid decliners                              | Ref                          |        | Ref             |       | Ref             |        | Ref             |       |                    |
| Rapid decliners                                  | 1.22(1.10-1.36)              | <0.001 | 1.10(0.98-1.23) | 0.09  | 1.39(1.19-1.63) | <0.001 | 1.25(1.05-1.42) | 0.010 | 0.10               |
| <b><i>Composite endpoint including death</i></b> |                              |        |                 |       |                 |        |                 |       |                    |
| Non-rapid decliners                              | Ref                          |        | Ref             |       | Ref             |        | Ref             |       |                    |
| Rapid decliners                                  | 1.27(1.18-1.38)              | <0.001 | 1.12(1.02-1.22) | 0.012 | 1.33(1.17-1.51) | <0.001 | 1.18(1.03-1.35) | 0.014 | 0.25               |

Model 1: unadjusted; Model 3: adjusted for baseline FEV<sub>1</sub>, age, sex, race, height, ARIC center, body mass index, heart rate, low-density-lipoprotein cholesterol, lipid-lowering medication, NT-proBNP, diabetes, hypertension, and smoking. Composite endpoint includes heart failure, stroke, and coronary disease. \*P for interaction was assessed in Model 3.

FEV<sub>1</sub>: forced expiratory volume in 1 s; HR (95%CI): hazard ratio and 95% confidence interval.



**Supplemental Table 7. Risk of cardiovascular disease according to decline in percentage of predicted FVC stratified for smokers (current and former) versus never smokers**

| Outcomes                                         | Smokers (current and former) |        |                 |        | Never smokers   |        |                 |       | p for interaction* |
|--------------------------------------------------|------------------------------|--------|-----------------|--------|-----------------|--------|-----------------|-------|--------------------|
|                                                  | Model 1                      |        | Model 3         |        | Model 1         |        | Model 3         |       |                    |
|                                                  | HR (95% CI)                  | p      | HR (95% CI)     | p      | HR (95% CI)     | p      | HR (95% CI)     | p     |                    |
| <b><i>Heart failure</i></b>                      |                              |        |                 |        |                 |        |                 |       |                    |
| Non-rapid decliners                              | Ref                          |        | Ref             |        | Ref             |        | Ref             |       |                    |
| Rapid decliners                                  | 1.38(1.21-1.58)              | <0.001 | 1.23(1.05-1.43) | 0.009  | 1.57(1.27-1.92) | <0.001 | 1.35(1.09-1.67) | 0.007 | 0.26               |
| <b><i>Coronary disease</i></b>                   |                              |        |                 |        |                 |        |                 |       |                    |
| Non-rapid decliners                              | Ref                          |        | Ref             |        | Ref             |        | Ref             |       |                    |
| Rapid decliners                                  | 1.28(1.09-1.49)              | 0.002  | 1.12(0.94-1.34) | 0.21   | 1.29(1.02-1.65) | 0.034  | 1.11(0.85-1.45) | 0.43  | 0.77               |
| <b><i>Stroke</i></b>                             |                              |        |                 |        |                 |        |                 |       |                    |
| Non-rapid decliners                              | Ref                          |        | Ref             |        | Ref             |        | Ref             |       |                    |
| Rapid decliners                                  | 1.16(0.94-1.44)              | 0.17   | 1.04(0.82-1.32) | 0.76   | 1.33(1.00-1.76) | 0.051  | 1.21(0.89-1.65) | 0.22  | 0.4                |
| <b><i>Death</i></b>                              |                              |        |                 |        |                 |        |                 |       |                    |
| Non-rapid decliners                              | Ref                          |        | Ref             |        | Ref             |        | Ref             |       |                    |
| Rapid decliners                                  | 1.47(1.34-1.61)              | <0.001 | 1.17(1.06-1.30) | 0.003  | 1.33(1.15-1.55) | <0.001 | 1.22(1.03-1.43) | 0.018 | 0.72               |
| <b><i>Composite endpoint without death</i></b>   |                              |        |                 |        |                 |        |                 |       |                    |
| Non-rapid decliners                              | Ref                          |        | Ref             |        | Ref             |        | Ref             |       |                    |
| Rapid decliners                                  | 1.27(1.15-1.42)              | <0.001 | 1.15(1.02-1.29) | 0.024  | 1.44(1.23-1.67) | <0.001 | 1.28(1.08-1.51) | 0.004 | 0.13               |
| <b><i>Composite endpoint including death</i></b> |                              |        |                 |        |                 |        |                 |       |                    |
| Non-rapid decliners                              | Ref                          |        | Ref             |        | Ref             |        | Ref             |       |                    |
| Rapid decliners                                  | 1.32(1.22-1.44)              | <0.001 | 1.18(1.08-1.30) | <0.001 | 1.38(1.22-1.56) | <0.001 | 1.25(1.10-1.43) | 0.001 | 0.25               |

Model 1: unadjusted; Model 3: adjusted for baseline FVC, age, sex, race, height, ARIC center, body mass index, heart rate, low-density-lipoprotein cholesterol, lipid-lowering medication, NT-proBNP, diabetes, hypertension, and smoking. Composite endpoint includes heart failure, stroke, and coronary disease. \*P for interaction was assessed in Model 3.

FVC: forced vital capacity; HR (95% CI): hazard ratio and 95% confidence interval.

**Supplemental Table 8. Risk of cardiovascular disease according to decline in percentage of predicted FEV1 or FVC after excluding those with probable COPD at Visit 1 (sample for this analysis 10,091 subjects)\***

| Outcomes                                  | FEV <sub>1</sub> criteria |       | FVC criteria     |        |
|-------------------------------------------|---------------------------|-------|------------------|--------|
|                                           | HR (95%CI)                | p     | HR (95%CI)       | p      |
| <i>Heart failure</i>                      |                           |       |                  |        |
| Non-rapid decliners                       | Ref                       |       | Ref              |        |
| Rapid decliners                           | 1.15 (1.01-1.30)          | 0.035 | 1.24 (1.09-1.41) | 0.001  |
| <i>Coronary disease</i>                   |                           |       |                  |        |
| Non-rapid decliners                       | Ref                       |       | Ref              |        |
| Rapid decliners                           | 1.02 (0.88-1.18)          | 0.82  | 1.07 (0.91-1.24) | 0.42   |
| <i>Stroke</i>                             |                           |       |                  |        |
| Non-rapid decliners                       | Ref                       |       | Ref              |        |
| Rapid decliners                           | 1.22 (1.01-1.47)          | 0.035 | 1.09 (0.89-1.32) | 0.40   |
| <i>Death</i>                              |                           |       |                  |        |
| Non-rapid decliners                       | Ref                       |       | Ref              |        |
| Rapid decliners                           | 1.15 (1.05-1.26)          | 0.002 | 1.22 (1.12-1.34) | <0.001 |
| <i>Composite endpoint without death</i>   |                           |       |                  |        |
| Non-rapid decliners                       | Ref                       |       | Ref              |        |
| Rapid decliners                           | 1.12 (1.02-1.24)          | 0.019 | 1.16 (1.05-1.28) | 0.003  |
| <i>Composite endpoint including death</i> |                           |       |                  |        |
| Non-rapid decliners                       | Ref                       |       | Ref              |        |
| Rapid decliners                           | 1.12 (1.04-1.21)          | 0.003 | 1.18 (1.09-1.28) | <0.001 |

\*Adjusted for: baseline parameter, age, sex, race, and height; ARIC center, body mass index, heart rate, low-density-lipoprotein cholesterol, lipid-lowering medication, NT-proBNP, diabetes, hypertension, and smoking. Composite endpoint includes heart failure, stroke, and coronary disease. FEV<sub>1</sub>: forced expiratory volume in 1 s; FVC: forced vital capacity; HR (95%CI): hazard ratio and 95% confidence interval.

**Supplemental Figure 1. TITLE: Flow chart showing derivation of the study sample from the overall ARIC cohort.**

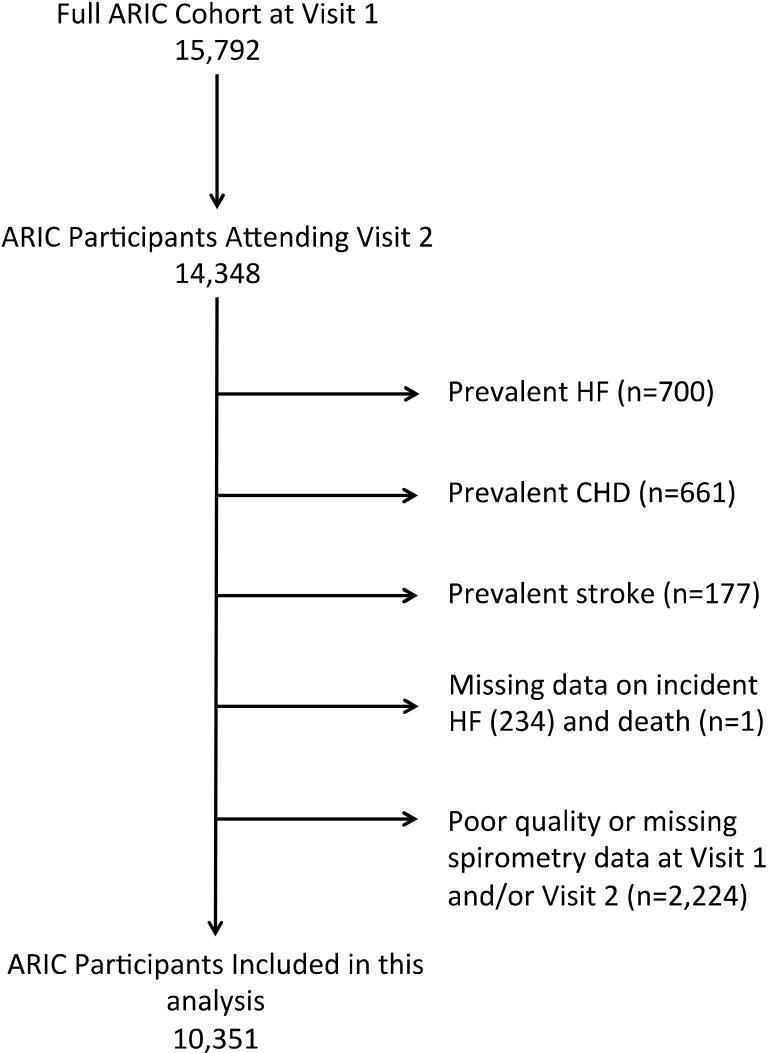

**Supplemental Figure 2. TITLE: Association of rapid decline in FEV<sub>1</sub> with incident heart failure at ≤ or > 1 year follow-up. CAPTION:** Rapid decline is defined as greatest quartile of decline in FEV<sub>1</sub> over a mean of 2.9 years. Kaplan-Meier curves demonstrate the rates of incident heart failure among the rapid decliner and non-rapid decliner groups either (A) during the first year of follow-up, or (B) after the first year of follow-up. P for interaction for decline in percentage of predicted FEV<sub>1</sub> and time with respect to incident HF was significant at p=0.003. Hazard ratios (HR) and associated 95% confidence intervals are calculated from Cox regression models adjusted for age, sex, race, ARIC center, height, heart rate, body mass index, LDL-cholesterol, NT-proBNP, diabetes, hypertension, and smoking.

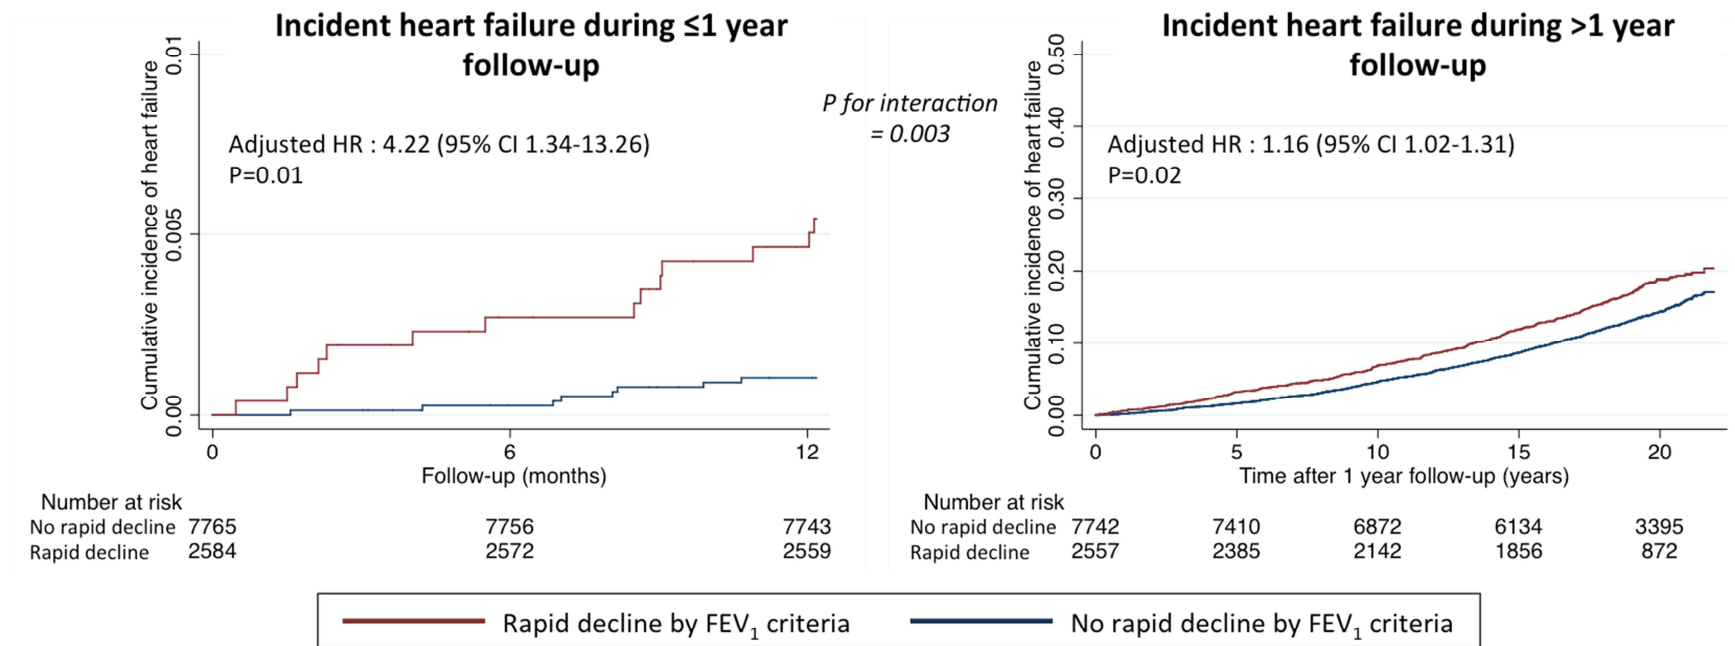

Supplement: NIHMS980864-supplement-supplement_1.pdf [file NIHMS980864-supplement-supplement_1.pdf]
